# Supplementary material for: Synthesis and high-performance of a new sarcosinate anionic surfactant with a long unsaturated tail
Source: Royal Society of Chemistry journal article supplement (doi:10.1039/c3ra44338h), 2013-11-26
Supplement: c3ra44338h.pdf [file c3ra44338h.pdf]

## Synthesis and high-performance of a new sarcosinate anionic surfactant with long unsaturated tail

Runchong Yao,<sup>a,b</sup> Jiasheng Qian,<sup>a</sup> Huazhen Li,<sup>b</sup> Akram Yasin,<sup>b</sup> Yongjun Xie<sup>b</sup> and Haiyang Yang<sup>b,\*</sup>

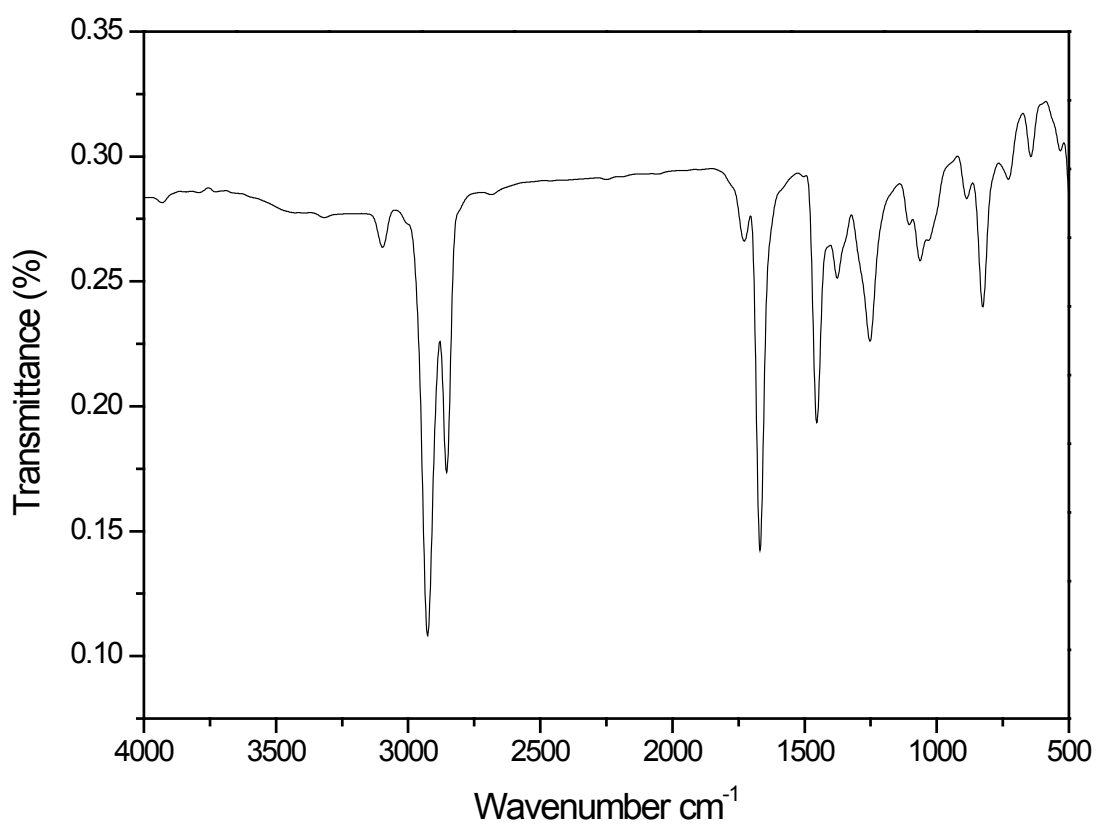

Fig.1 IR spectroscopy of EMAA.

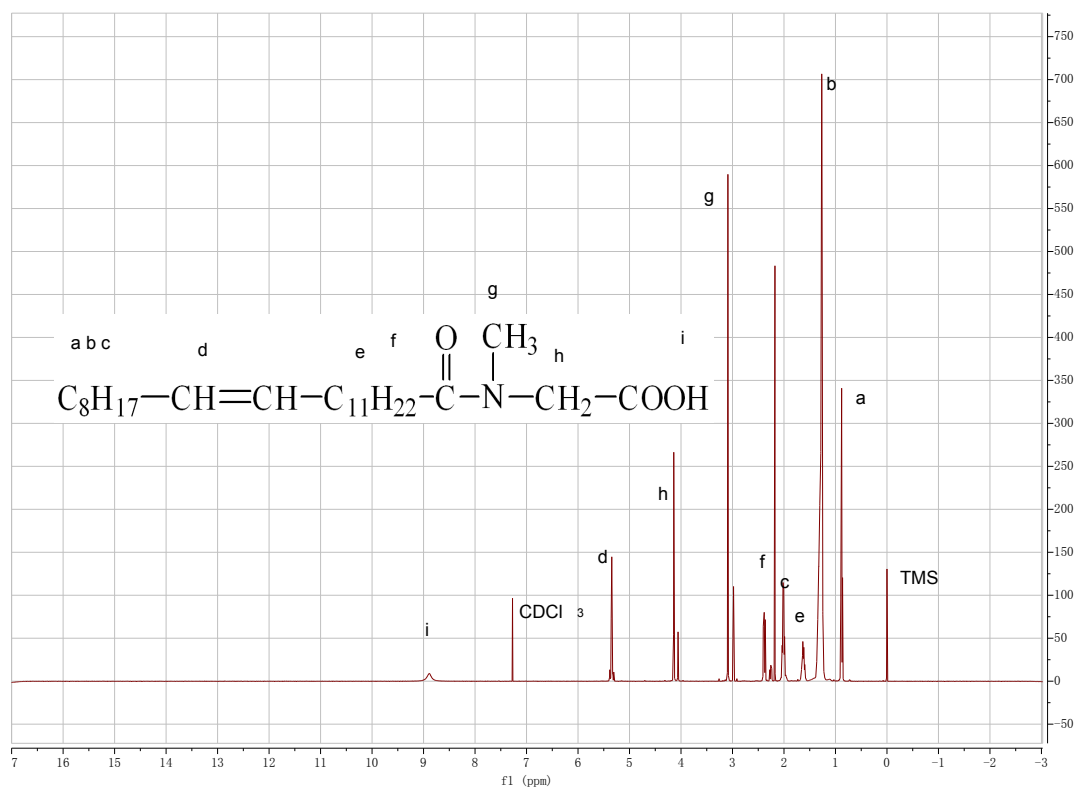

Fig.2 <sup>1</sup>H NMR spectroscopy of EMAA.

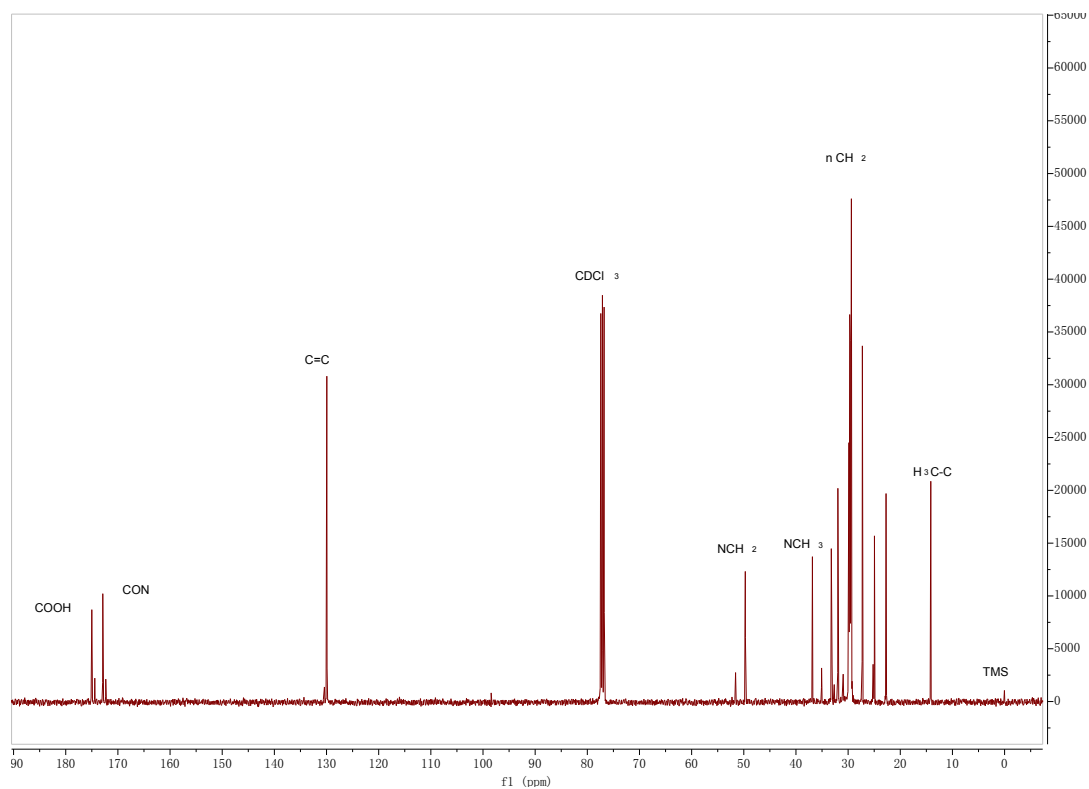

Fig.3 <sup>13</sup>C NMR spectroscopy of EMAA.

| elementary | N (%) | C (%) | H (%) | O (%) | N Factor | C Factor | H Factor | O Factor |
|------------|-------|-------|-------|-------|----------|----------|----------|----------|
| content    | 3.42  | 73.18 | 11.47 | 12.01 | 1.0076   | 1.0129   | 0.9979   | 0.9404   |

Table.1 Result of elemental analysis. This was measured in Vario EL cube elemental made in Germany.
